# Supplementary material for: Bohemian Knotweed Reynoutria × bohemica Chrtek et Chrtková Seems Not to Rely Heavily on Allelopathy for Its Persistence in Invaded Sites in the Southwest Part of the Zagreb, Croatia
Source: MDPI journal article supplement (doi:10.3390/plants12112222), 2023-06-05
Supplement: s1 [file s1]

# Supplementary Material

**Table S1.** Shoot values for 75 germinated 14-day old *Sinapis alba* seedlings (Shoot length, Fresh and Dry mass and Dry/Fresh mass ratio) after two treatments (rey5 – 0.05 g/ml of leaf exudate; rey10 – 0.1 g/ml of leaf exudate) with *R. × bohemica* leaf exudates and control (distilled water).

| treatment | replicate | length<br>(cm) | mass/fresh<br>(mg) | mass/dry<br>(mg) | dry/fresh*100 |
|-----------|-----------|----------------|--------------------|------------------|---------------|
| rey10     | 1         | 5.946          | 100.7              | 7.9              | 7.8           |
| rey10     | 1         | 3.29           | 46.8               | 5.1              | 10.9          |
| rey10     | 1         | 4.185          | 87.7               | 5.7              | 6.5           |
| rey10     | 1         | 3.114          | 45                 | 3.8              | 8.4           |
| rey10     | 1         | 4.115          | 52.7               | 5.2              | 9.9           |
| rey10     | 1         | 2.968          | 37.6               | 3.6              | 9.6           |
| rey10     | 1         | 3.775          | 48.1               | 6.1              | 12.7          |
| rey10     | 3         | 5.424          | 73.3               | 4.7              | 6.4           |
| rey10     | 3         | 3.403          | 74.6               | 5                | 6.7           |
| rey10     | 3         | 3.875          | 51.8               | 2.8              | 5.4           |
| rey10     | 3         | 4.39           | 57.9               | 5.4              | 9.3           |
| rey10     | 3         | 3.882          | 60.1               | 4.3              | 7.2           |
| rey10     | 3         | 3.874          | 59                 | 5.1              | 8.6           |
| rey10     | 3         | 2              | 19.3               | 0.5              | 2.6           |
| rey5      | 1         | 6.042          | 103                | 5.8              | 5.6           |
| rey5      | 1         | 5.38           | 97.4               | 5.4              | 5.5           |
| rey5      | 1         | 4.914          | 52.9               | 3.4              | 6.4           |
| rey5      | 1         | 4.499          | 92.7               | 6.8              | 7.3           |
| rey5      | 1         | 5.156          | 87.8               | 5.1              | 5.8           |
| rey5      | 1         | 3.714          | 44.7               | 4.4              | 9.8           |
| rey5      | 1         | 5.898          | 71.8               | 4.5              | 6.3           |
| rey5      | 1         | 1.714          | 35.8               | 3.3              | 9.2           |
| rey5      | 1         | 2.134          | 33.5               | 2.8              | 8.4           |
| rey5      | 2         | 5.498          | 93.6               | 6.3              | 6.7           |
| rey5      | 2         | 6.282          | 94.8               | 6.1              | 6.4           |
| rey5      | 2         | 3.153          | 88.3               | 6.1              | 6.9           |
| rey5      | 2         | 3.052          | 49.8               | 3                | 6.0           |
| rey5      | 2         | 3.706          | 56.1               | 5.9              | 10.5          |
| rey5      | 2         | 3.577          | 52                 | 4.5              | 8.7           |
| rey5      | 2         | 4.313          | 57.6               | 4.7              | 8.2           |
| rey5      | 3         | 4.873          | 93.5               | 6                | 6.4           |
| rey5      | 3         | 4.506          | 94.8               | 7.9              | 8.3           |
| rey5      | 3         | 4.357          | 68.3               | 5.4              | 7.9           |
| rey5      | 3         | 4.439          | 89.2               | 6.8              | 7.6           |
| rey5      | 3         | 4.037          | 49.2               | 3.5              | 7.1           |
| rey5      | 3         | 3.82           | 46                 | 3.6              | 7.8           |
| rey5      | 3         | 3.662          | 51.3               | 4.3              | 8.4           |
| control   | 1         | 5.317          | 123.2              | 6.4              | 5.2           |
| control   | 1         | 5.786          | 138.1              | 6.8              | 4.9           |
| control   | 1         | 6.949          | 165                | 8.1              | 4.9           |
| control   | 1         | 5.442          | 130.2              | 7.1              | 5.5           |

|         |   |       |       |     |      |
|---------|---|-------|-------|-----|------|
| control | 1 | 5.834 | 119.4 | 5.8 | 4.9  |
| control | 1 | 5.01  | 136.8 | 6.3 | 4.6  |
| control | 1 | 5.116 | 108.5 | 6.1 | 5.6  |
| control | 1 | 4.93  | 70.4  | 5.1 | 7.2  |
| control | 1 | 4.062 | 152.1 | 7.6 | 5.0  |
| control | 1 | 4.249 | 89    | 4.3 | 4.8  |
| control | 1 | 3.857 | 91.3  | 6.2 | 6.8  |
| control | 1 | 2.761 | 56.8  | 5.3 | 9.3  |
| control | 2 | 5.026 | 131.7 | 7.3 | 5.5  |
| control | 2 | 4.912 | 97.1  | 5.6 | 5.8  |
| control | 2 | 5.821 | 127.6 | 6.5 | 5.1  |
| control | 2 | 7.374 | 134.8 | 7   | 5.2  |
| control | 2 | 5.641 | 124.3 | 6.4 | 5.1  |
| control | 2 | 4.764 | 79.5  | 4.3 | 5.4  |
| control | 2 | 4.901 | 85.6  | 5.2 | 6.1  |
| control | 2 | 5.582 | 128.5 | 6.7 | 5.2  |
| control | 2 | 3.634 | 99.4  | 5.8 | 5.8  |
| control | 2 | 4.576 | 78.4  | 5.9 | 7.5  |
| control | 2 | 2.967 | 66.1  | 4.1 | 6.2  |
| control | 2 | 2.304 | 39.5  | 3.5 | 8.9  |
| control | 3 | 5.341 | 172.1 | 8.2 | 4.8  |
| control | 3 | 5.791 | 171.4 | 8.8 | 5.1  |
| control | 3 | 4.648 | 155.8 | 7.7 | 4.9  |
| control | 3 | 5.832 | 144   | 7.3 | 5.1  |
| control | 3 | 5.59  | 115.4 | 5.7 | 4.9  |
| control | 3 | 5.285 | 156.7 | 8.2 | 5.2  |
| control | 3 | 4.651 | 126.1 | 6.4 | 5.1  |
| control | 3 | 5.27  | 160.9 | 8.6 | 5.3  |
| control | 3 | 3.882 | 126.2 | 7.4 | 5.9  |
| control | 3 | 4.358 | 104.3 | 5.4 | 5.2  |
| control | 3 | 2.992 | 76.5  | 5.6 | 7.3  |
| control | 3 | 3.04  | 55.5  | 3.9 | 7.0  |
| control | 3 | 2.821 | 55.5  | 5.9 | 10.6 |
| control | 3 | 1.848 | 38.1  | 4.9 | 12.9 |

**Table S2.** Shoot values for 75 germinated 14-day old *Triticum aestivum* seedlings (Shoot length, Fresh and Dry mass and Dry/Fresh mass ratio) after two treatments (rey5 – 0.05 g/ml of leaf exudate; rey10 – 0.1 g/ml of leaf exudate) with *R. × bohemica* leaf exudates and control (distilled water).

| treatment | replicate | length<br>(cm) | mass/fresh<br>(mg) | mass/dry<br>(mg) | dry/fresh*100 |
|-----------|-----------|----------------|--------------------|------------------|---------------|
| rey10     | 1         | 15.944         | 93.2               | 10.6             | 11.4          |
| rey10     | 2         | 14.138         | 73.9               | 8.3              | 11.2          |
| rey10     | 2         | 19.268         | 127.9              | 14.2             | 11.1          |
| rey10     | 2         | 15.277         | 95                 | 11.3             | 11.9          |
| rey10     | 3         | 16.005         | 129                | 16.3             | 12.6          |
| rey10     | 3         | 15.084         | 93.2               | 11.4             | 12.2          |
| rey10     | 3         | 12.291         | 56.3               | 6.8              | 12.1          |
| rey10     | 3         | 9.714          | 62.2               | 7.8              | 12.5          |
| rey5      | 1         | 20.555         | 175.3              | 21.1             | 12.0          |
| rey5      | 1         | 18.454         | 161                | 18.9             | 11.7          |
| rey5      | 1         | 8.673          | 48                 | 5.9              | 12.3          |
| rey5      | 1         | 6.231          | 45.9               | 5                | 10.9          |
| rey5      | 1         | 3.211          | 17                 | 1.6              | 9.4           |
| rey5      | 2         | 18.829         | 153.2              | 17.3             | 11.3          |
| rey5      | 2         | 11.809         | 65.6               | 7.1              | 10.8          |
| rey5      | 2         | 11.009         | 77.5               | 8.7              | 11.2          |
| rey5      | 2         | 2.6            | 19.3               | 2.4              | 12.4          |
| rey5      | 3         | 17.295         | 151                | 18.8             | 12.5          |
| rey5      | 3         | 11.79          | 75.2               | 8.9              | 11.8          |
| rey5      | 3         | 9.29           | 54.6               | 6.3              | 11.5          |
| control   | 1         | 24.861         | 221.2              | 21.9             | 9.9           |
| control   | 1         | 22.893         | 259                | 24.2             | 9.3           |
| control   | 1         | 19.799         | 176.7              | 18               | 10.2          |
| control   | 1         | 15.804         | 131.7              | 15.8             | 12.0          |
| control   | 1         | 16.191         | 119.7              | 11.4             | 9.5           |
| control   | 1         | 11.439         | 87.8               | 10               | 11.4          |
| control   | 2         | 28.123         | 257.5              | 23.9             | 9.3           |
| control   | 2         | 21.582         | 210                | 21               | 10.0          |
| control   | 2         | 19.099         | 171.6              | 17               | 9.9           |
| control   | 2         | 20.842         | 206.6              | 19.5             | 9.4           |
| control   | 2         | 16.432         | 152.8              | 17.6             | 11.5          |
| control   | 2         | 15.457         | 160.9              | 15.8             | 9.8           |
| control   | 2         | 16.654         | 156.7              | 15.7             | 10.0          |
| control   | 2         | 10.707         | 75.4               | 8.2              | 10.9          |
| control   | 3         | 22.24          | 179.2              | 18.9             | 10.5          |
| control   | 3         | 17.051         | 140.1              | 13.6             | 9.7           |
| control   | 3         | 18.344         | 169.1              | 19.2             | 11.4          |
| control   | 3         | 15.786         | 143                | 15.5             | 10.8          |
| control   | 3         | 16.06          | 122.9              | 11.9             | 9.7           |
| control   | 3         | 13.517         | 125.4              | 13.4             | 10.7          |
| control   | 3         | 12.247         | 53.4               | 5.8              | 10.9          |
| control   | 3         | 12.657         | 93.3               | 9.5              | 10.2          |
| control   | 3         | 8.94           | 49.8               | 5                | 10.0          |

**Table S3.** Results of the Kruskal-Wallis test and post-hoc comparisons of mean ranks of all pairs of groups for comparison of *Sinapis alba* seedlings Shoot length after two treatments (rey5 – 0.05 g/ml of leaf exudate; rey10 – 0.1 g/ml of leaf exudate) with *R. × bohemica* leaf exudates and control (distilled water). All treatments in triplicate with 17 seeds per replicate. Statistically significant values for  $p < 0.05$  are printed in red.

| Depend.:<br>length<br>(cm) | Kruskal-Wallis test: H ( 2, N= 75) =5.468829 p =.0649 |         |              |           |
|----------------------------|-------------------------------------------------------|---------|--------------|-----------|
|                            | Code                                                  | Valid N | Sum of Ranks | Mean Rank |
| rey10                      | 1                                                     | 14      | 386.500      | 27.60714  |
| rey5                       | 2                                                     | 23      | 826.000      | 35.91304  |
| control                    | 3                                                     | 38      | 1637.500     | 43.09211  |

| Depend.:<br>length<br>(cm) | Multiple Comparisons z' values - upper right part<br>Multiple Comparisons p values (2-tailed) - lower left part |          |          |
|----------------------------|-----------------------------------------------------------------------------------------------------------------|----------|----------|
|                            | rey10                                                                                                           | rey5     | control  |
| rey10                      |                                                                                                                 | 1.124261 | 2.272571 |
| rey5                       | 0.782707                                                                                                        |          | 1.246843 |
| control                    | 0.069156                                                                                                        | 0.637365 |          |

**Table S4.** Results of the Kruskal-Wallis test and post-hoc comparisons of mean ranks of all pairs of groups for comparison of *Sinapis alba* seedlings Fresh mass after two treatments (rey5 – 0.05 g/ml of leaf exudate; rey10 – 0.1 g/ml of leaf exudate) with *R. × bohemica* leaf exudates and control (distilled water). All treatments in triplicate with 17 seeds per replicate. Statistically significant values for  $p < 0.05$  are printed in red.

| Depend.:<br>mass/fresh<br>(mg) | Kruskal-Wallis test: H ( 2, N= 75) =26.12181 p =0.0000 |         |              |           |
|--------------------------------|--------------------------------------------------------|---------|--------------|-----------|
|                                | Code                                                   | Valid N | Sum of Ranks | Mean Rank |
| rey10                          | 1                                                      | 14      | 292.000      | 20.85714  |
| rey5                           | 2                                                      | 23      | 640.000      | 27.82609  |
| control                        | 3                                                      | 38      | 1918.000     | 50.47368  |

| Depend.:<br>mass/fresh<br>(mg) | Multiple Comparisons z' values - upper right part<br>Multiple Comparisons p values (2-tailed) - lower left part |          |          |
|--------------------------------|-----------------------------------------------------------------------------------------------------------------|----------|----------|
|                                | rey10                                                                                                           | rey5     | control  |
| rey10                          |                                                                                                                 | 0.943294 | 4.346520 |
| rey5                           | 1.000000                                                                                                        |          | 3.933382 |
| control                        | 0.000041                                                                                                        | 0.000251 |          |

**Table S5.** Results of the Kruskal-Wallis test and post-hoc comparisons of mean ranks of all pairs of groups for comparison of *Sinapis alba* seedlings Dry mass after two treatments (rey5 – 0.05 g/ml of leaf exudate; rey10 – 0.1 g/ml of leaf exudate) with *R. × bohemica* leaf exudates and control (distilled water). All treatments in triplicate with 17 seeds per replicate. Statistically significant values for  $p < 0.05$  are printed in red.

| Depend.:<br>mass/dry<br>(mg) | Kruskal-Wallis test: H ( 2, N= 75) =14.66624 p =0.0007 |         |              |           |
|------------------------------|--------------------------------------------------------|---------|--------------|-----------|
|                              | Code                                                   | Valid N | Sum of Ranks | Mean Rank |
| rey10                        | 1                                                      | 14      | 357.500      | 25.53571  |
| rey5                         | 2                                                      | 23      | 692.000      | 30.08696  |
| control                      | 3                                                      | 38      | 1800.500     | 47.38158  |

| Depend.:<br>mass/dry<br>(mg) | Multiple Comparisons z' values - upper right part<br>Multiple Comparisons p values (2-tailed) - lower left part |          |          |
|------------------------------|-----------------------------------------------------------------------------------------------------------------|----------|----------|
|                              | rey10                                                                                                           | rey5     | control  |
| rey10                        |                                                                                                                 | 0.616042 | 3.206096 |
| rey5                         | 1.000000                                                                                                        |          | 3.003690 |
| control                      | 0.004036                                                                                                        | 0.008002 |          |

**Table S6.** Results of the Kruskal-Wallis test and post-hoc comparisons of mean ranks of all pairs of groups for comparison of *Sinapis alba* seedlings Dry/Fresh mass ratio after two treatments (rey5 – 0.05 g/ml of leaf exudate; rey10 – 0.1 g/ml of leaf exudate) with *R. × bohemica* leaf exudates and control (distilled water). All treatments in triplicate with 17 seeds per replicate. Statistically significant values for  $p < 0.05$  are printed in red.

| Depend.:<br>dry/fresh*100 | Kruskal-Wallis test: H ( 2, N= 75) =21.38261 p =0.0000 |         |              |           |
|---------------------------|--------------------------------------------------------|---------|--------------|-----------|
|                           | Code                                                   | Valid N | Sum of Ranks | Mean Rank |
| rey10                     | 1                                                      | 14      | 720.000      | 51.42857  |
| rey5                      | 2                                                      | 23      | 1121.000     | 48.73913  |
| control                   | 3                                                      | 38      | 1009.000     | 26.55263  |

| Depend.:<br>dry/fresh*100 | Multiple Comparisons z' values - upper right part<br>Multiple Comparisons p values (2-tailed) - lower left part |          |          |
|---------------------------|-----------------------------------------------------------------------------------------------------------------|----------|----------|
|                           | rey10                                                                                                           | rey5     | control  |
| rey10                     |                                                                                                                 | 0.364034 | 3.650790 |
| rey5                      | 1.000000                                                                                                        |          | 3.853300 |
| control                   | 0.000784                                                                                                        | 0.000350 |          |

**Table S7.** Results of the Kruskal-Wallis test and post-hoc comparisons of mean ranks of all pairs of groups for comparison of *Triticum aestivum* seedlings Shoot length after two treatments (rey5 – 0.05 g/ml of leaf exudate; rey10 – 0.1 g/ml of leaf exudate) with *R. × bohemica* leaf exudates and control (distilled water). All treatments in triplicate with 17 seeds per replicate. Statistically significant values for  $p < 0.05$  are printed in red.

| Depend.:<br>length<br>(cm) | Kruskal-Wallis test: H ( 2, N= 43) =6.941137 p =0.0311 |         |              |           |
|----------------------------|--------------------------------------------------------|---------|--------------|-----------|
|                            | Code                                                   | Valid N | Sum of Ranks | Mean Rank |
| rey10                      | 1                                                      | 8       | 157.000      | 19.62500  |
| rey5                       | 2                                                      | 12      | 180.000      | 15.00000  |
| control                    | 3                                                      | 23      | 609.000      | 26.47826  |

| Depend.:<br>length<br>(cm) | Multiple Comparisons z' values - upper right part<br>Multiple Comparisons p values (2-tailed) - lower left part |          |          |
|----------------------------|-----------------------------------------------------------------------------------------------------------------|----------|----------|
|                            | rey10                                                                                                           | rey5     | control  |
| rey10                      |                                                                                                                 | 0.806979 | 1.329705 |
| rey5                       | 1.000000                                                                                                        |          | 2.567005 |
| control                    | 0.550846                                                                                                        | 0.030774 |          |

**Table S8.** Results of the Kruskal-Wallis test and post-hoc comparisons of mean ranks of all pairs of groups for comparison of *Triticum aestivum* seedlings Fresh mass after two treatments (rey5 – 0.05 g/ml of leaf exudate; rey10 – 0.1 g/ml of leaf exudate) with *R. × bohemica* leaf exudates and control (distilled water). All treatments in triplicate with 17 seeds per replicate. Statistically significant values for  $p < 0.05$  are printed in red.

| Depend.:<br>mass/fresh<br>(mg) | Kruskal-Wallis test: H ( 2, N= 43) =10.51165 p =0.0052 |         |              |           |
|--------------------------------|--------------------------------------------------------|---------|--------------|-----------|
|                                | Code                                                   | Valid N | Sum of Ranks | Mean Rank |
| rey10                          | 1                                                      | 8       | 127.000      | 15.87500  |
| rey5                           | 2                                                      | 12      | 180.000      | 15.00000  |
| control                        | 3                                                      | 23      | 639.000      | 27.78261  |

| Depend.:<br>mass/fresh<br>(mg) | Multiple Comparisons z' values - upper right part<br>Multiple Comparisons p values (2-tailed) - lower left part |          |          |
|--------------------------------|-----------------------------------------------------------------------------------------------------------------|----------|----------|
|                                | rey10                                                                                                           | rey5     | control  |
| rey10                          |                                                                                                                 | 0.152672 | 2.310376 |
| rey5                           | 1.000000                                                                                                        |          | 2.858710 |
| control                        | 0.062602                                                                                                        | 0.012761 |          |

**Table S9.** Results of the Kruskal-Wallis test and post-hoc comparisons of mean ranks of all pairs of groups for comparison of *Triticum aestivum* seedlings Dry mass after two treatments (rey5 – 0.05 g/ml of leaf exudate; rey10 – 0.1 g/ml of leaf exudate) with *R. × bohemica* leaf exudates and control (distilled water). All treatments in triplicate with 17 seeds per replicate. Statistically significant values for  $p < 0.05$  are printed in red.

| Depend.:<br>mass/dry<br>(mg) | Kruskal-Wallis test: H ( 2, N= 43) =6.748904 p =0.0342 |         |              |           |
|------------------------------|--------------------------------------------------------|---------|--------------|-----------|
|                              | Code                                                   | Valid N | Sum of Ranks | Mean Rank |
| rey10                        | 1                                                      | 8       | 137.500      | 17.18750  |
| rey5                         | 2                                                      | 12      | 196.000      | 16.33333  |
| control                      | 3                                                      | 23      | 612.500      | 26.63043  |

| Depend.:<br>mass/dry<br>(mg) | Multiple Comparisons z' values - upper right part<br>Multiple Comparisons p values (2-tailed) - lower left part |          |          |
|------------------------------|-----------------------------------------------------------------------------------------------------------------|----------|----------|
|                              | rey10                                                                                                           | rey5     | control  |
| rey10                        |                                                                                                                 | 0.149037 | 1.832167 |
| rey5                         | 1.000000                                                                                                        |          | 2.302850 |
| control                      | 0.200780                                                                                                        | 0.063862 |          |

**Table S10.** Results of the Kruskal-Wallis test and post-hoc comparisons of mean ranks of all pairs of groups for comparison of *Triticum aestivum* seedlings Dry/Fresh mass ratio after two treatments (rey5 – 0.05 g/ml of leaf exudate; rey10 – 0.1 g/ml of leaf exudate) with *R. × bohemica* leaf exudates and control (distilled water). All treatments in triplicate with 17 seeds per replicate. Statistically significant values for  $p < 0.05$  are printed in red.

| Depend.:<br>dry/fresh*100 | Kruskal-Wallis test: H ( 2, N= 43) =18.91821 p =0.0001 |         |              |           |
|---------------------------|--------------------------------------------------------|---------|--------------|-----------|
|                           | Code                                                   | Valid N | Sum of Ranks | Mean Rank |
| rey10                     | 1                                                      | 8       | 270.000      | 33.75000  |
| rey5                      | 2                                                      | 12      | 345.000      | 28.75000  |
| control                   | 3                                                      | 23      | 331.000      | 14.39130  |

| Depend.:<br>dry/fresh*100 | Multiple Comparisons z' values - upper right part<br>Multiple Comparisons p values (2-tailed) - lower left part |          |          |
|---------------------------|-----------------------------------------------------------------------------------------------------------------|----------|----------|
|                           | rey10                                                                                                           | rey5     | control  |
| rey10                     |                                                                                                                 | 0.872410 | 3.756075 |
| rey5                      | 1.000000                                                                                                        |          | 3.211187 |
| control                   | 0.000518                                                                                                        | 0.003966 |          |

**Table S11.** Shoot values for *Sinapis alba* seedlings (Shoot length, Fresh and Dry mass and Dry/Fresh mass ratio) planted in soil sampled at three locations (Mladost, Kajzerica and Nasip) with three samples on each site, inside the stand of the Bohemian knotweed, at the edge of the stand and controls outside the stand.

| locality | position | length (cm) | mass fresh [g] | mass dry [g] | mass ratio dry/fresh |
|----------|----------|-------------|----------------|--------------|----------------------|
| mladost  | stand    | 1.49        | 0.026          | 0.006        | 0.2308               |
| mladost  | stand    | 1.89        | 0.023          | 0.004        | 0.1739               |
| mladost  | stand    | 6.30        | 0.146          | 0.010        | 0.0685               |
| mladost  | stand    | 7.81        | 0.127          | 0.007        | 0.0551               |
| mladost  | stand    | 7.77        | 0.115          | 0.005        | 0.0435               |
| mladost  | stand    | 8.98        | 0.212          | 0.012        | 0.0566               |
| mladost  | stand    | 9.61        | 0.230          | 0.012        | 0.0522               |
| mladost  | stand    | 4.54        | 0.066          | 0.002        | 0.0303               |
| mladost  | stand    | 8.00        | 0.114          | 0.006        | 0.0526               |
| mladost  | stand    | 6.60        | 0.124          | 0.008        | 0.0645               |
| mladost  | stand    | 8.62        | 0.146          | 0.009        | 0.0616               |
| mladost  | stand    | 8.37        | 0.131          | 0.008        | 0.0611               |
| mladost  | stand    | 2.27        | 0.019          | 0.004        | 0.2105               |
| mladost  | stand    | 3.06        | 0.054          | 0.006        | 0.1111               |
| mladost  | stand    | 9.01        | 0.144          | 0.010        | 0.0694               |
| mladost  | stand    | 7.01        | 0.126          | 0.008        | 0.0635               |
| mladost  | stand    | 8.38        | 0.140          | 0.006        | 0.0429               |
| mladost  | stand    | 8.22        | 0.094          | 0.005        | 0.0532               |
| mladost  | stand    | 8.81        | 0.116          | 0.008        | 0.0690               |
| mladost  | stand    | 7.80        | 0.117          | 0.008        | 0.0684               |
| mladost  | stand    | 6.53        | 0.126          | 0.007        | 0.0556               |
| mladost  | stand    | 5.95        | 0.114          | 0.006        | 0.0526               |
| mladost  | edge     | 7.99        | 0.142          | 0.010        | 0.0704               |
| mladost  | edge     | 9.25        | 0.127          | 0.008        | 0.0630               |
| mladost  | edge     | 7.63        | 0.105          | 0.004        | 0.0381               |
| mladost  | edge     | 8.12        | 0.095          | 0.005        | 0.0526               |
| mladost  | edge     | 9.19        | 0.151          | 0.011        | 0.0728               |
| mladost  | edge     | 8.19        | 0.149          | 0.010        | 0.0671               |
| mladost  | edge     | 7.74        | 0.121          | 0.008        | 0.0661               |
| mladost  | edge     | 8.35        | 0.147          | 0.010        | 0.0680               |
| mladost  | edge     | 6.51        | 0.097          | 0.006        | 0.0619               |
| mladost  | edge     | 8.38        | 0.164          | 0.011        | 0.0671               |
| mladost  | edge     | 10.38       | 0.140          | 0.007        | 0.0500               |
| mladost  | edge     | 7.93        | 0.122          | 0.005        | 0.0410               |
| mladost  | edge     | 8.47        | 0.154          | 0.010        | 0.0649               |
| mladost  | edge     | 9.62        | 0.163          | 0.010        | 0.0613               |
| mladost  | edge     | 8.80        | 0.124          | 0.005        | 0.0403               |
| mladost  | edge     | 9.25        | 0.110          | 0.005        | 0.0455               |
| mladost  | edge     | 10.46       | 0.160          | 0.010        | 0.0625               |
| mladost  | edge     | 8.39        | 0.139          | 0.007        | 0.0504               |
| mladost  | edge     | 8.24        | 0.128          | 0.006        | 0.0469               |
| mladost  | edge     | 9.97        | 0.148          | 0.007        | 0.0473               |
| mladost  | edge     | 8.52        | 0.181          | 0.009        | 0.0497               |
| mladost  | edge     | 9.01        | 0.183          | 0.010        | 0.0546               |



|           |         |       |       |       |        |
|-----------|---------|-------|-------|-------|--------|
| mladost   | edge    | 9.87  | 0.161 | 0.007 | 0.0435 |
| mladost   | edge    | 8.01  | 0.100 | 0.005 | 0.0500 |
| mladost   | control | 6.76  | 0.130 | 0.007 | 0.0538 |
| mladost   | control | 8.90  | 0.161 | 0.009 | 0.0559 |
| mladost   | control | 8.71  | 0.132 | 0.008 | 0.0606 |
| mladost   | control | 7.05  | 0.185 | 0.012 | 0.0649 |
| mladost   | control | 4.67  | 0.057 | 0.004 | 0.0702 |
| mladost   | control | 8.56  | 0.119 | 0.006 | 0.0504 |
| mladost   | control | 7.53  | 0.104 | 0.005 | 0.0481 |
| mladost   | control | 4.93  | 0.150 | 0.008 | 0.0533 |
| mladost   | control | 8.58  | 0.126 | 0.010 | 0.0794 |
| mladost   | control | 8.10  | 0.136 | 0.010 | 0.0735 |
| mladost   | control | 6.05  | 0.178 | 0.013 | 0.0730 |
| mladost   | control | 8.21  | 0.069 | 0.004 | 0.0580 |
| mladost   | control | 5.89  | 0.086 | 0.006 | 0.0698 |
| mladost   | control | 6.37  | 0.110 | 0.008 | 0.0727 |
| mladost   | control | 8.26  | 0.112 | 0.008 | 0.0714 |
| mladost   | control | 6.83  | 0.115 | 0.009 | 0.0783 |
| kajzerica | control | 1.65  | 0.025 | 0.003 | 0.1200 |
| kajzerica | control | 1.83  | 0.025 | 0.003 | 0.1200 |
| kajzerica | control | 1.56  | 0.025 | 0.002 | 0.0800 |
| kajzerica | control | 4.06  | 0.078 | 0.008 | 0.1026 |
| kajzerica | control | 9.85  | 0.377 | 0.017 | 0.0451 |
| kajzerica | control | 8.82  | 0.161 | 0.010 | 0.0621 |
| kajzerica | control | 8.08  | 0.172 | 0.011 | 0.0640 |
| kajzerica | control | 6.85  | 0.133 | 0.008 | 0.0602 |
| kajzerica | control | 8.94  | 0.210 | 0.014 | 0.0667 |
| kajzerica | control | 6.35  | 0.206 | 0.012 | 0.0583 |
| kajzerica | control | 7.93  | 0.190 | 0.012 | 0.0632 |
| kajzerica | control | 7.63  | 0.164 | 0.010 | 0.0610 |
| kajzerica | control | 7.63  | 0.106 | 0.006 | 0.0566 |
| kajzerica | control | 8.75  | 0.206 | 0.011 | 0.0534 |
| kajzerica | control | 4.03  | 0.062 | 0.003 | 0.0484 |
| kajzerica | control | 4.62  | 0.082 | 0.004 | 0.0488 |
| kajzerica | control | 7.63  | 0.216 | 0.010 | 0.0463 |
| kajzerica | control | 8.62  | 0.229 | 0.012 | 0.0524 |
| kajzerica | control | 10.00 | 0.256 | 0.012 | 0.0469 |
| kajzerica | control | 8.36  | 0.258 | 0.013 | 0.0504 |
| kajzerica | control | 8.74  | 0.174 | 0.007 | 0.0402 |
| kajzerica | stand   | 6.53  | 0.132 | 0.008 | 0.0606 |
| kajzerica | stand   | 7.47  | 0.139 | 0.009 | 0.0647 |
| kajzerica | stand   | 8.08  | 0.214 | 0.014 | 0.0654 |
| kajzerica | stand   | 7.90  | 0.131 | 0.008 | 0.0611 |
| kajzerica | stand   | 8.66  | 0.132 | 0.009 | 0.0682 |
| kajzerica | stand   | 8.61  | 0.116 | 0.006 | 0.0517 |
| kajzerica | stand   | 7.32  | 0.098 | 0.005 | 0.0510 |
| kajzerica | stand   | 4.99  | 0.070 | 0.004 | 0.0571 |
| kajzerica | stand   | 5.19  | 0.068 | 0.005 | 0.0735 |

|           |       |       |       |       |        |
|-----------|-------|-------|-------|-------|--------|
| kajzerica | stand | 3.71  | 0.051 | 0.003 | 0.0588 |
| kajzerica | stand | 7.98  | 0.151 | 0.007 | 0.0464 |
| kajzerica | stand | 10.25 | 0.138 | 0.012 | 0.0870 |
| kajzerica | stand | 7.58  | 0.135 | 0.005 | 0.0370 |
| kajzerica | stand | 7.19  | 0.158 | 0.007 | 0.0443 |
| kajzerica | stand | 10.16 | 0.159 | 0.008 | 0.0503 |
| kajzerica | stand | 7.25  | 0.092 | 0.005 | 0.0543 |
| kajzerica | stand | 9.90  | 0.140 | 0.008 | 0.0571 |
| kajzerica | stand | 7.48  | 0.111 | 0.006 | 0.0541 |
| kajzerica | stand | 8.77  | 0.142 | 0.007 | 0.0493 |
| kajzerica | stand | 7.56  | 0.101 | 0.006 | 0.0594 |
| kajzerica | stand | 6.91  | 0.251 | 0.010 | 0.0398 |
| kajzerica | stand | 8.12  | 0.153 | 0.008 | 0.0523 |
| kajzerica | stand | 11.25 | 0.131 | 0.014 | 0.1069 |
| kajzerica | stand | 8.26  | 0.247 | 0.016 | 0.0648 |
| kajzerica | stand | 10.82 | 0.173 | 0.012 | 0.0694 |
| kajzerica | stand | 8.19  | 0.142 | 0.007 | 0.0493 |
| kajzerica | stand | 7.86  | 0.140 | 0.006 | 0.0429 |
| kajzerica | stand | 7.13  | 0.152 | 0.008 | 0.0526 |
| kajzerica | stand | 8.08  | 0.162 | 0.009 | 0.0556 |
| kajzerica | edge  | 8.19  | 0.172 | 0.011 | 0.0640 |
| kajzerica | edge  | 6.81  | 0.132 | 0.006 | 0.0455 |
| kajzerica | edge  | 7.35  | 0.132 | 0.006 | 0.0455 |
| kajzerica | edge  | 7.12  | 0.149 | 0.008 | 0.0537 |
| kajzerica | edge  | 7.88  | 0.131 | 0.007 | 0.0534 |
| kajzerica | edge  | 7.82  | 0.126 | 0.007 | 0.0556 |
| kajzerica | edge  | 5.50  | 0.134 | 0.006 | 0.0448 |
| kajzerica | edge  | 5.55  | 0.107 | 0.004 | 0.0374 |
| kajzerica | edge  | 6.80  | 0.131 | 0.006 | 0.0458 |
| kajzerica | edge  | 5.91  | 0.117 | 0.005 | 0.0427 |
| kajzerica | edge  | 9.89  | 0.238 | 0.013 | 0.0546 |
| kajzerica | edge  | 8.84  | 0.188 | 0.012 | 0.0638 |
| kajzerica | edge  | 7.87  | 0.164 | 0.012 | 0.0732 |
| kajzerica | edge  | 7.81  | 0.192 | 0.014 | 0.0729 |
| kajzerica | edge  | 7.70  | 0.167 | 0.008 | 0.0479 |
| kajzerica | edge  | 9.08  | 0.253 | 0.018 | 0.0711 |
| kajzerica | edge  | 8.70  | 0.202 | 0.011 | 0.0545 |
| kajzerica | edge  | 7.45  | 0.157 | 0.007 | 0.0446 |
| kajzerica | edge  | 7.83  | 0.148 | 0.011 | 0.0743 |
| kajzerica | edge  | 7.34  | 0.119 | 0.006 | 0.0504 |
| kajzerica | edge  | 7.70  | 0.130 | 0.006 | 0.0462 |
| kajzerica | edge  | 9.37  | 0.259 | 0.020 | 0.0772 |
| kajzerica | edge  | 8.75  | 0.143 | 0.007 | 0.0490 |
| kajzerica | edge  | 6.14  | 0.129 | 0.009 | 0.0698 |
| kajzerica | edge  | 9.46  | 0.147 | 0.009 | 0.0612 |
| kajzerica | edge  | 5.32  | 0.199 | 0.011 | 0.0553 |
| kajzerica | edge  | 9.34  | 0.146 | 0.007 | 0.0479 |
| kajzerica | edge  | 7.05  | 0.136 | 0.005 | 0.0368 |

|           |         |       |       |       |        |
|-----------|---------|-------|-------|-------|--------|
| kajzerica | edge    | 5.77  | 0.094 | 0.003 | 0.0319 |
| nasip     | control | 7.69  | 0.162 | 0.008 | 0.0494 |
| nasip     | control | 8.00  | 0.149 | 0.008 | 0.0537 |
| nasip     | control | 7.28  | 0.156 | 0.009 | 0.0577 |
| nasip     | control | 6.31  | 0.155 | 0.009 | 0.0581 |
| nasip     | control | 7.31  | 0.111 | 0.005 | 0.0450 |
| nasip     | control | 10.16 | 0.209 | 0.014 | 0.0670 |
| nasip     | control | 4.42  | 0.057 | 0.004 | 0.0702 |
| nasip     | control | 8.00  | 0.183 | 0.012 | 0.0656 |
| nasip     | control | 7.80  | 0.164 | 0.011 | 0.0671 |
| nasip     | control | 7.65  | 0.160 | 0.010 | 0.0625 |
| nasip     | control | 8.37  | 0.141 | 0.008 | 0.0567 |
| nasip     | control | 9.59  | 0.139 | 0.007 | 0.0504 |
| nasip     | control | 9.65  | 0.138 | 0.007 | 0.0507 |
| nasip     | control | 6.91  | 0.169 | 0.011 | 0.0651 |
| nasip     | control | 3.03  | 0.023 | 0.003 | 0.1304 |
| nasip     | edge    | 6.96  | 0.139 | 0.011 | 0.0791 |
| nasip     | edge    | 6.84  | 0.155 | 0.012 | 0.0774 |
| nasip     | edge    | 5.98  | 0.099 | 0.005 | 0.0505 |
| nasip     | edge    | 7.32  | 0.131 | 0.010 | 0.0763 |
| nasip     | edge    | 7.28  | 0.141 | 0.011 | 0.0780 |
| nasip     | edge    | 8.41  | 0.151 | 0.012 | 0.0795 |
| nasip     | edge    | 8.04  | 0.162 | 0.013 | 0.0802 |
| nasip     | edge    | 6.71  | 0.115 | 0.008 | 0.0696 |
| nasip     | edge    | 7.40  | 0.153 | 0.011 | 0.0719 |
| nasip     | edge    | 7.04  | 0.129 | 0.008 | 0.0620 |
| nasip     | edge    | 7.21  | 0.116 | 0.007 | 0.0603 |
| nasip     | edge    | 6.64  | 0.100 | 0.007 | 0.0700 |
| nasip     | edge    | 8.10  | 0.156 | 0.011 | 0.0705 |
| nasip     | edge    | 7.30  | 0.135 | 0.009 | 0.0667 |
| nasip     | edge    | 6.41  | 0.092 | 0.004 | 0.0435 |
| nasip     | edge    | 6.68  | 0.129 | 0.009 | 0.0698 |
| nasip     | edge    | 8.00  | 0.149 | 0.011 | 0.0738 |
| nasip     | edge    | 5.99  | 0.148 | 0.010 | 0.0676 |
| nasip     | edge    | 8.18  | 0.183 | 0.014 | 0.0765 |
| nasip     | edge    | 7.58  | 0.145 | 0.011 | 0.0759 |
| nasip     | edge    | 6.81  | 0.075 | 0.005 | 0.0667 |
| nasip     | edge    | 6.93  | 0.170 | 0.012 | 0.0706 |
| nasip     | edge    | 7.09  | 0.139 | 0.009 | 0.0647 |
| nasip     | edge    | 8.95  | 0.166 | 0.012 | 0.0723 |
| nasip     | edge    | 6.43  | 0.129 | 0.008 | 0.0620 |
| nasip     | stand   | 8.66  | 0.135 | 0.008 | 0.0593 |
| nasip     | stand   | 8.18  | 0.130 | 0.008 | 0.0615 |
| nasip     | stand   | 8.42  | 0.144 | 0.012 | 0.0833 |
| nasip     | stand   | 8.00  | 0.121 | 0.007 | 0.0579 |
| nasip     | stand   | 7.03  | 0.122 | 0.007 | 0.0574 |
| nasip     | stand   | 6.72  | 0.139 | 0.011 | 0.0791 |
| nasip     | stand   | 5.35  | 0.143 | 0.012 | 0.0839 |

|       |       |      |       |       |        |
|-------|-------|------|-------|-------|--------|
| nasip | stand | 4.21 | 0.067 | 0.006 | 0.0896 |
| nasip | stand | 5.78 | 0.121 | 0.008 | 0.0661 |
| nasip | stand | 7.62 | 0.201 | 0.014 | 0.0697 |
| nasip | stand | 7.79 | 0.196 | 0.014 | 0.0714 |
| nasip | stand | 6.79 | 0.209 | 0.015 | 0.0718 |
| nasip | stand | 6.01 | 0.142 | 0.010 | 0.0704 |
| nasip | stand | 4.03 | 0.057 | 0.003 | 0.0526 |
| nasip | stand | 1.05 | 0.013 | 0.001 | 0.0769 |
| nasip | stand | 8.24 | 0.174 | 0.013 | 0.0747 |
| nasip | stand | 8.44 | 0.157 | 0.010 | 0.0637 |
| nasip | stand | 7.40 | 0.182 | 0.014 | 0.0769 |

**Table S12.** Shoot values for *Triticum aestivum* seedlings (Shoot length, Fresh and Dry mass and Dry/Fresh mass ratio) planted in soil sampled at three locations (Mladost, Kajzerica and Nasip) with three samples on each site, inside the stand of the Bohemian knotweed, at the edge of the stand and controls outside the stand.

| locality | position | length (cm) | mass fresh [g] | mass dry [g] | mass ratio dry/fresh |
|----------|----------|-------------|----------------|--------------|----------------------|
| mladost  | stand    | 20.84       | 0.120          | 0.013        | 0.1083               |
| mladost  | stand    | 20.49       | 0.136          | 0.016        | 0.1176               |
| mladost  | stand    | 32.73       | 0.246          | 0.030        | 0.1220               |
| mladost  | stand    | 2.39        | 0.020          | 0.002        | 0.1000               |
| mladost  | stand    | 21.91       | 0.205          | 0.023        | 0.1122               |
| mladost  | stand    | 24.45       | 0.185          | 0.020        | 0.1081               |
| mladost  | stand    | 20.97       | 0.142          | 0.016        | 0.1127               |
| mladost  | stand    | 17.75       | 0.124          | 0.013        | 0.1048               |
| mladost  | stand    | 17.48       | 0.096          | 0.004        | 0.0417               |
| mladost  | stand    | 21.20       | 0.168          | 0.017        | 0.1012               |
| mladost  | stand    | 23.19       | 0.163          | 0.017        | 0.1043               |
| mladost  | stand    | 21.97       | 0.142          | 0.016        | 0.1127               |
| mladost  | stand    | 21.58       | 0.160          | 0.019        | 0.1188               |
| mladost  | stand    | 21.59       | 0.182          | 0.023        | 0.1264               |
| mladost  | stand    | 17.47       | 0.113          | 0.012        | 0.1062               |
| mladost  | stand    | 20.00       | 0.181          | 0.024        | 0.1326               |
| mladost  | stand    | 18.38       | 0.119          | 0.014        | 0.1176               |
| mladost  | stand    | 18.58       | 0.139          | 0.015        | 0.1079               |
| mladost  | stand    | 20.08       | 0.138          | 0.015        | 0.1087               |
| mladost  | stand    | 18.01       | 0.129          | 0.014        | 0.1085               |
| mladost  | stand    | 22.01       | 0.155          | 0.020        | 0.1290               |
| mladost  | stand    | 19.22       | 0.131          | 0.015        | 0.1145               |
| mladost  | stand    | 22.75       | 0.180          | 0.022        | 0.1222               |
| mladost  | edge     | 19.19       | 0.155          | 0.020        | 0.1290               |
| mladost  | edge     | 17.82       | 0.125          | 0.017        | 0.1360               |
| mladost  | edge     | 23.58       | 0.193          | 0.023        | 0.1192               |
| mladost  | edge     | 22.92       | 0.150          | 0.020        | 0.1333               |
| mladost  | edge     | 21.64       | 0.155          | 0.021        | 0.1355               |
| mladost  | edge     | 19.31       | 0.156          | 0.020        | 0.1282               |
| mladost  | edge     | 22.56       | 0.143          | 0.017        | 0.1189               |
| mladost  | edge     | 17.85       | 0.133          | 0.015        | 0.1128               |
| mladost  | edge     | 22.78       | 0.146          | 0.019        | 0.1301               |
| mladost  | edge     | 23.44       | 0.181          | 0.022        | 0.1215               |
| mladost  | edge     | 17.26       | 0.117          | 0.015        | 0.1282               |
| mladost  | edge     | 18.66       | 0.134          | 0.018        | 0.1343               |
| mladost  | edge     | 22.12       | 0.178          | 0.020        | 0.1124               |
| mladost  | edge     | 19.66       | 0.136          | 0.017        | 0.1250               |
| mladost  | edge     | 20.65       | 0.166          | 0.018        | 0.1084               |
| mladost  | edge     | 18.25       | 0.130          | 0.011        | 0.0846               |
| mladost  | edge     | 20.08       | 0.133          | 0.014        | 0.1053               |
| mladost  | edge     | 23.46       | 0.213          | 0.022        | 0.1033               |
| mladost  | edge     | 17.53       | 0.146          | 0.020        | 0.1370               |
| mladost  | edge     | 26.38       | 0.231          | 0.026        | 0.1126               |
| mladost  | edge     | 17.08       | 0.110          | 0.014        | 0.1273               |

|           |         |       |       |       |        |
|-----------|---------|-------|-------|-------|--------|
| mladost   | edge    | 23.28 | 0.177 | 0.022 | 0.1243 |
| mladost   | edge    | 20.94 | 0.105 | 0.015 | 0.1429 |
| mladost   | edge    | 22.22 | 0.165 | 0.018 | 0.1091 |
| mladost   | control | 20.05 | 0.141 | 0.016 | 0.1135 |
| mladost   | control | 28.40 | 0.256 | 0.026 | 0.1016 |
| mladost   | control | 24.10 | 0.182 | 0.023 | 0.1264 |
| mladost   | control | 28.19 | 0.266 | 0.032 | 0.1203 |
| mladost   | control | 1.39  | 0.010 | 0.001 | 0.1000 |
| mladost   | control | 25.70 | 0.183 | 0.022 | 0.1202 |
| mladost   | control | 25.79 | 0.157 | 0.019 | 0.1210 |
| mladost   | control | 12.84 | 0.093 | 0.014 | 0.1505 |
| mladost   | control | 2.82  | 0.022 | 0.004 | 0.1818 |
| mladost   | control | 11.60 | 0.085 | 0.013 | 0.1529 |
| mladost   | control | 13.99 | 0.102 | 0.016 | 0.1569 |
| mladost   | control | 1.74  | 0.016 | 0.003 | 0.1875 |
| mladost   | control | 25.65 | 0.163 | 0.023 | 0.1411 |
| mladost   | control | 21.04 | 0.128 | 0.018 | 0.1406 |
| mladost   | control | 25.78 | 0.189 | 0.022 | 0.1164 |
| mladost   | control | 16.74 | 0.096 | 0.015 | 0.1563 |
| mladost   | control | 19.49 | 0.128 | 0.020 | 0.1563 |
| mladost   | control | 24.81 | 0.206 | 0.029 | 0.1408 |
| mladost   | control | 16.57 | 0.119 | 0.017 | 0.1429 |
| mladost   | control | 19.73 | 0.150 | 0.019 | 0.1267 |
| kajzerica | control | 1.59  | 0.015 | 0.003 | 0.2000 |
| kajzerica | control | 2.68  | 0.025 | 0.005 | 0.2000 |
| kajzerica | control | 27.26 | 0.263 | 0.027 | 0.1027 |
| kajzerica | control | 26.85 | 0.297 | 0.029 | 0.0976 |
| kajzerica | control | 24.14 | 0.221 | 0.025 | 0.1131 |
| kajzerica | control | 25.79 | 0.255 | 0.027 | 0.1059 |
| kajzerica | control | 26.62 | 0.210 | 0.024 | 0.1143 |
| kajzerica | control | 25.59 | 0.226 | 0.025 | 0.1106 |
| kajzerica | control | 21.75 | 0.153 | 0.018 | 0.1176 |
| kajzerica | control | 27.25 | 0.195 | 0.022 | 0.1128 |
| kajzerica | control | 23.80 | 0.185 | 0.020 | 0.1081 |
| kajzerica | control | 24.06 | 0.189 | 0.020 | 0.1058 |
| kajzerica | control | 20.86 | 0.146 | 0.010 | 0.0685 |
| kajzerica | control | 23.24 | 0.186 | 0.023 | 0.1237 |
| kajzerica | control | 18.83 | 0.123 | 0.015 | 0.1220 |
| kajzerica | control | 17.60 | 0.114 | 0.009 | 0.0789 |
| kajzerica | control | 6.69  | 0.039 | 0.005 | 0.1282 |
| kajzerica | control | 24.83 | 0.200 | 0.026 | 0.1300 |
| kajzerica | control | 21.46 | 0.150 | 0.015 | 0.1000 |
| kajzerica | control | 24.54 | 0.165 | 0.017 | 0.1030 |
| kajzerica | control | 23.62 | 0.166 | 0.017 | 0.1024 |
| kajzerica | control | 31.60 | 0.215 | 0.027 | 0.1256 |
| kajzerica | control | 16.21 | 0.099 | 0.012 | 0.1212 |
| kajzerica | control | 23.34 | 0.187 | 0.018 | 0.0963 |
| kajzerica | control | 23.20 | 0.186 | 0.018 | 0.0968 |

|           |         |       |       |       |        |
|-----------|---------|-------|-------|-------|--------|
| kajzerica | control | 16.34 | 0.068 | 0.005 | 0.0735 |
| kajzerica | stand   | 26.26 | 0.198 | 0.023 | 0.1162 |
| kajzerica | stand   | 25.56 | 0.226 | 0.025 | 0.1106 |
| kajzerica | stand   | 25.34 | 0.224 | 0.023 | 0.1027 |
| kajzerica | stand   | 23.49 | 0.165 | 0.018 | 0.1091 |
| kajzerica | stand   | 27.19 | 0.273 | 0.027 | 0.0989 |
| kajzerica | stand   | 21.43 | 0.179 | 0.020 | 0.1117 |
| kajzerica | stand   | 20.99 | 0.138 | 0.016 | 0.1159 |
| kajzerica | stand   | 19.94 | 0.144 | 0.017 | 0.1181 |
| kajzerica | stand   | 14.20 | 0.056 | 0.006 | 0.1071 |
| kajzerica | stand   | 10.19 | 0.075 | 0.009 | 0.1200 |
| kajzerica | stand   | 20.06 | 0.137 | 0.017 | 0.1241 |
| kajzerica | stand   | 20.66 | 0.142 | 0.013 | 0.0915 |
| kajzerica | stand   | 25.54 | 0.217 | 0.025 | 0.1152 |
| kajzerica | stand   | 20.90 | 0.146 | 0.014 | 0.0959 |
| kajzerica | stand   | 24.77 | 0.165 | 0.019 | 0.1152 |
| kajzerica | stand   | 21.16 | 0.150 | 0.017 | 0.1133 |
| kajzerica | stand   | 22.80 | 0.182 | 0.020 | 0.1099 |
| kajzerica | stand   | 23.25 | 0.163 | 0.019 | 0.1166 |
| kajzerica | stand   | 24.31 | 0.195 | 0.021 | 0.1077 |
| kajzerica | stand   | 21.33 | 0.162 | 0.015 | 0.0926 |
| kajzerica | stand   | 24.93 | 0.223 | 0.023 | 0.1031 |
| kajzerica | stand   | 26.38 | 0.188 | 0.018 | 0.0957 |
| kajzerica | stand   | 26.26 | 0.229 | 0.023 | 0.1004 |
| kajzerica | stand   | 21.66 | 0.162 | 0.015 | 0.0926 |
| kajzerica | stand   | 20.85 | 0.168 | 0.016 | 0.0952 |
| kajzerica | stand   | 25.40 | 0.222 | 0.021 | 0.0946 |
| kajzerica | stand   | 0.00  | 0.006 | 0.001 | 0.1667 |
| kajzerica | edge    | 21.52 | 0.164 | 0.018 | 0.1098 |
| kajzerica | edge    | 22.38 | 0.170 | 0.019 | 0.1118 |
| kajzerica | edge    | 20.87 | 0.160 | 0.016 | 0.1000 |
| kajzerica | edge    | 25.34 | 0.227 | 0.027 | 0.1189 |
| kajzerica | edge    | 24.10 | 0.209 | 0.022 | 0.1053 |
| kajzerica | edge    | 23.00 | 0.192 | 0.020 | 0.1042 |
| kajzerica | edge    | 15.42 | 0.121 | 0.012 | 0.0992 |
| kajzerica | edge    | 18.09 | 0.143 | 0.017 | 0.1189 |
| kajzerica | edge    | 25.21 | 0.256 | 0.028 | 0.1094 |
| kajzerica | edge    | 26.39 | 0.308 | 0.032 | 0.1039 |
| kajzerica | edge    | 27.45 | 0.270 | 0.029 | 0.1074 |
| kajzerica | edge    | 25.11 | 0.253 | 0.024 | 0.0949 |
| kajzerica | edge    | 24.51 | 0.169 | 0.013 | 0.0769 |
| kajzerica | edge    | 24.66 | 0.175 | 0.014 | 0.0800 |
| kajzerica | edge    | 25.23 | 0.252 | 0.024 | 0.0952 |
| kajzerica | edge    | 26.51 | 0.204 | 0.020 | 0.0980 |
| kajzerica | edge    | 25.00 | 0.288 | 0.033 | 0.1146 |
| kajzerica | edge    | 25.00 | 0.183 | 0.016 | 0.0874 |
| kajzerica | edge    | 25.98 | 0.213 | 0.023 | 0.1080 |
| kajzerica | edge    | 24.34 | 0.188 | 0.019 | 0.1011 |

|           |         |       |       |       |        |
|-----------|---------|-------|-------|-------|--------|
| kajzerica | edge    | 25.76 | 0.214 | 0.022 | 0.1028 |
| kajzerica | edge    | 21.94 | 0.163 | 0.016 | 0.0982 |
| kajzerica | edge    | 24.89 | 0.237 | 0.026 | 0.1097 |
| kajzerica | edge    | 26.63 | 0.215 | 0.023 | 0.1070 |
| kajzerica | edge    | 14.68 | 0.096 | 0.012 | 0.1250 |
| nasip     | control | 22.73 | 0.167 | 0.019 | 0.1138 |
| nasip     | control | 19.39 | 0.121 | 0.013 | 0.1074 |
| nasip     | control | 11.73 | 0.075 | 0.010 | 0.1333 |
| nasip     | control | 9.88  | 0.065 | 0.008 | 0.1231 |
| nasip     | control | 12.74 | 0.104 | 0.012 | 0.1154 |
| nasip     | control | 20.49 | 0.196 | 0.022 | 0.1122 |
| nasip     | control | 26.73 | 0.193 | 0.018 | 0.0933 |
| nasip     | control | 27.17 | 0.232 | 0.022 | 0.0948 |
| nasip     | control | 14.44 | 0.126 | 0.014 | 0.1111 |
| nasip     | control | 15.17 | 0.111 | 0.011 | 0.0991 |
| nasip     | control | 10.19 | 0.052 | 0.006 | 0.1154 |
| nasip     | edge    | 24.91 | 0.185 | 0.024 | 0.1297 |
| nasip     | edge    | 20.85 | 0.182 | 0.024 | 0.1319 |
| nasip     | edge    | 20.67 | 0.125 | 0.018 | 0.1440 |
| nasip     | edge    | 18.55 | 0.144 | 0.020 | 0.1389 |
| nasip     | edge    | 16.58 | 0.128 | 0.017 | 0.1328 |
| nasip     | edge    | 17.27 | 0.128 | 0.016 | 0.1250 |
| nasip     | edge    | 18.14 | 0.148 | 0.016 | 0.1081 |
| nasip     | edge    | 21.50 | 0.155 | 0.018 | 0.1161 |
| nasip     | edge    | 19.74 | 0.145 | 0.016 | 0.1103 |
| nasip     | edge    | 21.57 | 0.184 | 0.020 | 0.1087 |
| nasip     | edge    | 19.93 | 0.142 | 0.020 | 0.1408 |
| nasip     | edge    | 21.78 | 0.196 | 0.022 | 0.1122 |
| nasip     | edge    | 18.79 | 0.128 | 0.018 | 0.1406 |
| nasip     | edge    | 18.21 | 0.091 | 0.015 | 0.1648 |
| nasip     | edge    | 24.12 | 0.174 | 0.018 | 0.1034 |
| nasip     | edge    | 19.99 | 0.124 | 0.013 | 0.1048 |
| nasip     | edge    | 21.56 | 0.154 | 0.015 | 0.0974 |
| nasip     | edge    | 20.21 | 0.137 | 0.014 | 0.1022 |
| nasip     | edge    | 15.19 | 0.091 | 0.011 | 0.1209 |
| nasip     | edge    | 2.85  | 0.021 | 0.003 | 0.1429 |
| nasip     | stand   | 23.85 | 0.205 | 0.025 | 0.1220 |
| nasip     | stand   | 24.36 | 0.202 | 0.022 | 0.1089 |
| nasip     | stand   | 19.72 | 0.142 | 0.015 | 0.1056 |
| nasip     | stand   | 22.88 | 0.189 | 0.020 | 0.1058 |
| nasip     | stand   | 19.03 | 0.124 | 0.013 | 0.1048 |
| nasip     | stand   | 19.04 | 0.139 | 0.015 | 0.1079 |
| nasip     | stand   | 20.52 | 0.174 | 0.016 | 0.0920 |
| nasip     | stand   | 16.42 | 0.105 | 0.012 | 0.1143 |
| nasip     | stand   | 9.69  | 0.058 | 0.008 | 0.1379 |
| nasip     | stand   | 5.33  | 0.035 | 0.004 | 0.1143 |
| nasip     | stand   | 24.21 | 0.205 | 0.022 | 0.1073 |
| nasip     | stand   | 21.54 | 0.146 | 0.017 | 0.1164 |



|       |       |       |       |       |        |
|-------|-------|-------|-------|-------|--------|
| nasip | stand | 20.85 | 0.211 | 0.023 | 0.1090 |
| nasip | stand | 21.42 | 0.210 | 0.025 | 0.1190 |

**Table S13.** Results of the Kruskal-Wallis test and post-hoc comparisons of mean ranks of all pairs of groups for comparison of *Sinapis alba* seedlings Length grown in pot with soil sampled in triplicates inside the stand, at the edge of the stand and controls outside the stand of *R. x bohemica* at locality Mladost. Statistically significant values for  $p < 0.05$  are printed in red.

| Depend.:<br>length<br>(cm) | Sinapis alba; Locality Mladost<br>Kruskal-Wallis test: $H(2, N=62) = 12.84583$ $p = 0.0016$ |         |              |           |
|----------------------------|---------------------------------------------------------------------------------------------|---------|--------------|-----------|
|                            | Code                                                                                        | Valid N | Sum of Ranks | Mean Rank |
| stand                      | 1                                                                                           | 22      | 549.000      | 24.95455  |
| edge                       | 2                                                                                           | 24      | 1004.000     | 41.83333  |
| control                    | 3                                                                                           | 16      | 400.000      | 25.00000  |

| Depend.:<br>length<br>(cm) | Multiple Comparisons z' values - upper right part<br>Multiple Comparisons p values (2-tailed) - lower left part |          |          |
|----------------------------|-----------------------------------------------------------------------------------------------------------------|----------|----------|
|                            | stand                                                                                                           | edge     | control  |
| stand                      |                                                                                                                 | 3.169595 | 0.007668 |
| edge                       | 0.004580                                                                                                        |          | 2.890881 |
| control                    | 1.000000                                                                                                        | 0.011525 |          |

**Table S14.** Results of the Kruskal-Wallis test and post-hoc comparisons of mean ranks of all pairs of groups for comparison of *Sinapis alba* seedlings Dry/Fresh mass ratio grown in pot with soil sampled in triplicates inside the stand, at the edge of the stand and controls outside the stand of *R. x bohemica* at locality Mladost. Statistically significant values for  $p < 0.05$  are printed in red.

| Depend.:<br>dry/fresh*100 | Sinapis alba; Locality Mladost<br>Kruskal-Wallis test: $H(2, N=62) = 6.610391$ $p = 0.0367$ |         |              |           |
|---------------------------|---------------------------------------------------------------------------------------------|---------|--------------|-----------|
|                           | Code                                                                                        | Valid N | Sum of Ranks | Mean Rank |
| stand                     | 1                                                                                           | 22      | 734.500      | 33.38636  |
| edge                      | 2                                                                                           | 24      | 591.500      | 24.64583  |
| control                   | 3                                                                                           | 16      | 627.000      | 39.18750  |

| Depend.:<br>dry/fresh*100 | Multiple Comparisons z' values - upper right part<br>Multiple Comparisons p values (2-tailed) - lower left part |          |          |
|---------------------------|-----------------------------------------------------------------------------------------------------------------|----------|----------|
|                           | stand                                                                                                           | edge     | control  |
| stand                     |                                                                                                                 | 1.641347 | 0.978627 |
| edge                      | 0.302176                                                                                                        |          | 2.497321 |
| control                   | 0.983293                                                                                                        | 0.037541 |          |

**Table S15.** Results of the Kruskal-Wallis test and post-hoc comparisons of mean ranks of all pairs of groups for comparison of *Sinapis alba* seedlings Dry/Fresh mass ratio grown in pot with soil sampled in triplicates inside the stand, at the edge of the stand and controls outside the stand of *R. x bohemica* at locality Nasip. Statistically significant values for  $p < 0.05$  are printed in red.

|                           |                                                                                           |         |              |           |
|---------------------------|-------------------------------------------------------------------------------------------|---------|--------------|-----------|
| Depend.:<br>dry/fresh*100 | Sinapis alba; Locality Nasip<br>Kruskal-Wallis test: $H(2, N=58) = 9.713546$ $p = 0.0078$ |         |              |           |
|                           | Code                                                                                      | Valid N | Sum of Ranks | Mean Rank |
| stand                     | 1                                                                                         | 18      | 603.500      | 33.52778  |
| edge                      | 2                                                                                         | 25      | 840.500      | 33.62000  |
| control                   | 3                                                                                         | 15      | 267.000      | 17.80000  |

|                           |                                                                                                                 |          |          |
|---------------------------|-----------------------------------------------------------------------------------------------------------------|----------|----------|
| Depend.:<br>dry/fresh*100 | Multiple Comparisons z' values - upper right part<br>Multiple Comparisons p values (2-tailed) - lower left part |          |          |
|                           | stand                                                                                                           | edge     | control  |
| stand                     |                                                                                                                 | 0.017667 | 2.664053 |
| edge                      | 0.017667                                                                                                        |          | 2.868420 |
| control                   | 2.664053                                                                                                        | 2.868420 |          |

**Table S16.** Results of the Kruskal-Wallis test and post-hoc comparisons of mean ranks of all pairs of groups for comparison of *Triticum aestivum* seedlings Dry/Fresh mass ratio grown in pot with soil sampled in triplicates inside the stand, at the edge of the stand and controls outside the stand of *R. x bohemica* at locality Mladost. Statistically significant values for  $p < 0.05$  are printed in red.

|                           |                                                                                                  |         |              |           |
|---------------------------|--------------------------------------------------------------------------------------------------|---------|--------------|-----------|
| Depend.:<br>dry/fresh*100 | Triticum aestivum; Locality Mladost<br>Kruskal-Wallis test: $H(2, N=67) = 17.24147$ $p = 0.0002$ |         |              |           |
|                           | Code                                                                                             | Valid N | Sum of Ranks | Mean Rank |
| stand                     | 1                                                                                                | 23      | 500.500      | 21.76087  |
| edge                      | 2                                                                                                | 24      | 850.500      | 35.43750  |
| control                   | 3                                                                                                | 20      | 927.000      | 46.35000  |

|                           |                                                                                                                 |          |          |
|---------------------------|-----------------------------------------------------------------------------------------------------------------|----------|----------|
| Depend.:<br>dry/fresh*100 | Multiple Comparisons z' values - upper right part<br>Multiple Comparisons p values (2-tailed) - lower left part |          |          |
|                           | stand                                                                                                           | edge     | control  |
| stand                     |                                                                                                                 | 2.405462 | 4.127496 |
| edge                      | 0.048456                                                                                                        |          | 1.849768 |
| control                   | 0.000110                                                                                                        | 0.193041 |          |

**Table S17.** Results of the Kruskal-Wallis test and post-hoc comparisons of mean ranks of all pairs of groups for comparison of pH value of the soil sampled in triplicates at the location Mladost, inside the stand, at the edge of the stand and controls outside the stand (statistically significant values for  $p < 0.05$  are printed in red).

|                |                                                                             |         |              |           |
|----------------|-----------------------------------------------------------------------------|---------|--------------|-----------|
| Depend.:<br>pH | Locality Mladost<br>Kruskal-Wallis test: $H(2, N=9) = 6.488889$ $p = 0.039$ |         |              |           |
|                | Code                                                                        | Valid N | Sum of Ranks | Mean Rank |
| control        | 1                                                                           | 3       | 6.000        | 2.00000   |
| edge           | 2                                                                           | 3       | 16.000       | 5.33333   |
| stand          | 3                                                                           | 3       | 23.000       | 7.66667   |

|                            |                                                                                                                 |          |          |  |
|----------------------------|-----------------------------------------------------------------------------------------------------------------|----------|----------|--|
| Depend.:<br>length<br>(cm) | Multiple Comparisons z' values - upper right part<br>Multiple Comparisons p values (2-tailed) - lower left part |          |          |  |
|                            | control                                                                                                         | edge     | stand    |  |
| control                    |                                                                                                                 | 1.490712 | 2.534210 |  |
| edge                       | 0.408111                                                                                                        |          | 1.043498 |  |
| stand                      | 0.033810                                                                                                        | 0.890153 |          |  |

**Lab protocol LP1.** Kotzmann method for humus content determination.

Humus content was determined using the Kotzmann method, through the consumption of potassium permanganate ( $\text{KMnO}_4$ ), a strong oxidant. 0.2 g of ground soil was mixed with 130 ml of distilled water in an Erlenmeyer flask with the addition of 20 ml 32%  $\text{H}_2\text{SO}_4$  and 50 ml of 0.1 M  $\text{KMnO}_4$ . The suspensions were cooked, boiling for 10 minutes, immediately after which the excess  $\text{KMnO}_4$  was titrated using 0.1 M oxalic acid ( $\text{H}_2\text{C}_2\text{O}_4$ ) until discoloration. Since the decolorization is very slow, the excess of added oxalic acid was retitrated with 0.1 M  $\text{KMnO}_4$  solution. Humus content of the samples was calculated according to the following formulas:

$$\omega(C) = \frac{V(\text{g/cm}^3) * 0.000514 \text{ g}}{m(\text{g})} * 100$$

$$\omega(\text{humus}) = \omega(C) * 1.72$$

$\omega$  – mass fraction,  $V$  – volume of 0.1 M  $\text{KMnO}_4$  spent for oxidation, 0.000514 g – mass of carbon that oxidizes 1 ml of 0.1 M  $\text{KMnO}_4$  solution,  $m$  – mass of soil sample
